# Supplementary material for: Heterozygous loss-of-function variants of MEIS2 cause a triad of palatal defects, congenital heart defects, and intellectual disability
Source: Springer Nature journal article supplement (doi:10.1038/s41431-018-0281-5), 2018-10-05
Supplement: MOESM1 [file 41431_2018_281_MOESM1_ESM.pdf › 41431_2018_281_MOESM1_ESM.pdf]

| Exon | Forward                   | reverse                 |
|------|---------------------------|-------------------------|
| 1    | ATACTGGCCGCCATCATCAA      | GCCGCTCGTAACCTTCAGTT    |
| 2A   | TTGGTTTCTGTGTGCTCAACTT    | GTTTACCCATAGATCGCGTCC   |
| 2B   | TCCATGTACGGAGACCCTCA      | ACTCCCCACTTAGTCGTCCA    |
| 3    | GGGTTGTAAAGTGTGGTGCG      | TGTTCAAGTAGCTGGAGGCG    |
| 4    | CTCCACCGTACCCATTCTCA      | AGTGGTTACATCCTTCGGGT    |
| 5    | AGCACAGTGAACATCAGGGG      | CCCTGTGTTGAGAAGCGAGT    |
| 6    | CCTTGCCTTCAACTATTACACCC   | ACACCCAAGTCACCAAATCC    |
| 7    | TGCGTATATGCCTACTGCCAC     | ACTCTCCTGTTTACATGGCGG   |
| 8    | AGAGCTACTGCACTGTGTCAAG    | GAGGGTGCTCTTTGGATGGTAA  |
| 9    | TGCAAGTAGGAAAATCAAGCCA    | ACTCCGTATGAGGACTGTGC    |
| 10   | TGCTAGAGCCTGGTCTCCAT      | GATGAGGATTTGTGCCTGTGG   |
| 11   | CAGACAAACCACACCCCCAT      | AGAGGCCGGAAAATCAGCAA    |
| 12   | CCAAGGCAATAAGTGAAAAGGAATC | TCTGTGACTTCAGAGATGGGTGA |
