# Supplementary material for: Heterozygous loss-of-function variants of MEIS2 cause a triad of palatal defects, congenital heart defects, and intellectual disability
Source: Springer Nature journal article supplement (doi:10.1038/s41431-018-0281-5), 2018-10-05
Supplement: MOESM2 [file 41431_2018_281_MOESM2_ESM.pdf › 41431_2018_281_MOESM2_ESM.pdf]

|                         | Johansson, 2014                                                    | Johansson, 2014                                                    | Johansson, 2014                                                    | Johansson, 2014   | Crowley, 2010                      | Chen, 2016                                                                                                                  |
|-------------------------|--------------------------------------------------------------------|--------------------------------------------------------------------|--------------------------------------------------------------------|-------------------|------------------------------------|-----------------------------------------------------------------------------------------------------------------------------|
| Patient ID              | Family 1                                                           | Family 2                                                           | Family 3                                                           | Family 4          | Patient 1                          | Patient 1                                                                                                                   |
| Sex                     | 3F/1M                                                              | 1F/1M                                                              | M                                                                  | M                 | M                                  | M                                                                                                                           |
| 15q14 deletion (hg19)   | NR                                                                 | NR                                                                 | NR                                                                 | NR                | g.(?_37190737)_<br>(37313594_?)del | g.(?_33865665)_<br>(38723737_?)del                                                                                          |
| Size (Mb)               | 58 kb <b>dup</b>                                                   | 0.6 Mb                                                             | 1 Mb                                                               | 1.9 Mb            | 123 kb (mosaicΔ)                   | 4.9 Mb                                                                                                                      |
| CGH platform            | *                                                                  | *                                                                  | *                                                                  | *                 | SNP array                          | CytoChip 60k                                                                                                                |
| inheritance             | maternally#                                                        | maternally#                                                        | de novo                                                            | de novo           | de novo                            | de novo                                                                                                                     |
| other genetic defects   | NR                                                                 | NR                                                                 | NR                                                                 | NR                | NR                                 | NR                                                                                                                          |
| age                     | 3 – 32 y                                                           | 3 – 33 y                                                           | 3 y                                                                | 14 y              | NR                                 | foetus                                                                                                                      |
| cleft palate            | 4/4<br>CP (2), submucous CP<br>(2)                                 | 2/2<br>CP (1), CLP (1)                                             | normal                                                             | normal            | cleft soft palate                  | NR                                                                                                                          |
| cardiac malformation    | 0/4                                                                | VSD (1)                                                            | normal                                                             | VSD               | VSD                                | ToF                                                                                                                         |
| facial features         | broad forehead, high<br>anterior hairline, fine<br>arched eyebrows | broad forehead, high<br>anterior hairline, fine<br>arched eyebrows | broad forehead, high<br>anterior hairline, fine<br>arched eyebrows | NR                | NR                                 | long face, low-set<br>ears, beaked nose,<br>prominent nasal<br>bridge, narrow<br>forehead,<br>micrognathia,<br>pointed chin |
| biometry                | NR                                                                 | NR                                                                 | NR                                                                 | NR                | NR                                 | W: p75<br>L: p50                                                                                                            |
| Intellectual disability | learning problems                                                  | NR                                                                 | mild ID                                                            | learning problems | NR                                 | NR                                                                                                                          |
| walked at age           | 14 – 24 mo                                                         | 21 – 36 mo                                                         | 20 mo                                                              | 27 mo             | NR                                 | NR                                                                                                                          |
| brain imaging by MRI    | NR                                                                 | NR                                                                 | NR                                                                 | NR                | NR                                 | NR                                                                                                                          |
| behavioral problems     | NR                                                                 | NR                                                                 | autism                                                             | social problems   | NR                                 | NR                                                                                                                          |
| other features          | NR                                                                 | NR                                                                 | NR                                                                 | CAL spots         | hearing loss                       | NR                                                                                                                          |

**Supplementary table 2. Molecular and clinical data from previously published patients with 15q14 deletions, harboring MEIS2.** Patients with more extended 15q14 deletions proximally reaching beyond 15q13.3, or distally beyond 15q15, were excluded. 15q14 deletions, which were not delineated by means of array CGH, were excluded as well. Phenotypes from patients with microscopically visible 15q14 deletions were summarized by Erdogan *et al* (Erdogan et al. 2007) and by Chen *et al.* (Chen et al. 2016). \*Array-based genomic copy number analyses were either done on the Affymetrix 250K SNP array, the Affymetrix SNP Array 6.0, or the Agilent 105K Human Genome CGH Oligo Microarray. #This copy number variant was inherited from an affected parent. ΔThis deletion is found in approximately 40% of cells. Abbreviations: CAL spots: café-au-lait spots, CLP: cleft lip and palate, CP: cleft palate, HC: head circumference, ID: intellectual disability, L: length, NA: not available, NR: not reported, mo: months, PFO: patent foramen ovale, ToF: tetralogy of Fallot, VSD: ventricular septal defect, y: years, W: weight

|                         | Chen, 2008                                                                                                    | Brunetti-Pierri, 2008                                | Erdogan, 2007                                    | Roberti 2011                                                               | Shimajima 2017                     | Total                                                                   |
|-------------------------|---------------------------------------------------------------------------------------------------------------|------------------------------------------------------|--------------------------------------------------|----------------------------------------------------------------------------|------------------------------------|-------------------------------------------------------------------------|
| patient ID              | Patient 1                                                                                                     | patient 1                                            | patient 1                                        | patient 1                                                                  | patient 1                          | 15 patients                                                             |
| Sex                     | M                                                                                                             | M                                                    | F                                                | M                                                                          | M                                  | M/F = 10/5                                                              |
| 15q14 deletion (hg19)   | g.(?_34045708)_<br>(39689708_?)del                                                                            | g.(?_34439336)_<br>(38667981_?)del                   | g.(?_32378020)_<br>(37589340_?)del               | g.(?_35684649)_<br>(37285184_?)del                                         | g.(?_34105933)_<br>(37270012_?)del | 1 intragenic<br>duplication, 10<br>deletions                            |
| Size (Mb)               | 5.6 Mb                                                                                                        | 4.2 Mb                                               | 5.3 Mb                                           | 1.6 Mb                                                                     | 3.17 Mb                            | 2.83 Mb (mean)                                                          |
| CGH platform            | Nimblegen oligo                                                                                               | Agilent 244k                                         | 32k tiling array                                 | Agilent 105k                                                               | Agilent 60k                        | variable                                                                |
| inheritance             | de novo                                                                                                       | de novo                                              | de novo                                          | de novo                                                                    | de novo                            | 9 de novo, 1 familial<br>deletion, 1 familial<br>intragenic duplication |
| other genetic defects   | NR                                                                                                            | NR                                                   | NR                                               | balanced translocation                                                     | NR                                 |                                                                         |
| age                     | 4 y                                                                                                           | 6 y                                                  | 4 y                                              | 18 y 6 mo                                                                  | 9 y                                | NA                                                                      |
| cleft palate            | cleft palate                                                                                                  | bifid uvula                                          | cleft palate                                     | cleft palate                                                               | submucous CP                       | 12/14 (85%)                                                             |
| cardiac malformation    | VSD                                                                                                           | PFO                                                  | atrial septal defect                             | normal                                                                     | VSD                                | 7/15 (46%)                                                              |
| facial features         | long face, low-set ears,<br>beaked nose, prominent<br>nasal bridge, narrow<br>forehead, small pointed<br>chin | deep-set eyes, thin<br>upper lip, smooth<br>philtrum | low-set ears, short<br>philtrum, pointed<br>chin | deep-set eyes, short<br>philtrum, bitemporal<br>narrowing, pointed<br>chin | NR                                 | variable: bitemporal<br>narrowing, pointed<br>chin, beaked nose         |
| biometry                | W <p3<br>L <p3<br>HC <p3                                                                                      | W p25<br>L <p5<br>HC p75                             | W p3<br>L p50<br>HC p3                           | W p10-25<br>L <p3<br>HC p3                                                 | W p10<br>L p3<br>HC p50            | short stature (3/6),<br>microcephaly (3/5)                              |
| Intellectual disability | moderate ID                                                                                                   | mild ID                                              | moderate ID                                      | learning problems                                                          | mild ID                            | mild (9), moderate<br>(2), NA (4)                                       |
| walked at age           | NR                                                                                                            | 24 mo                                                | 18 mo                                            | 30 mo                                                                      | 20 mo                              | 14 – 36 mo                                                              |
| brain imaging by MRI    | normal                                                                                                        | normal                                               | NR                                               | hypoplastic frontal<br>lobes (CT)                                          | NR                                 | normal                                                                  |
| behavioral problems     | NR                                                                                                            | repetitive behavior,<br>autism                       | NR                                               | NR                                                                         | autism                             | autism (4)                                                              |
| other features          | epilepsy                                                                                                      | inguinal hernia, pectus<br>excavatum, pes planus     | hypotonia                                        | irregular dentition,<br>mild scoliosis                                     | recurrent ear<br>infections        |                                                                         |

**Supplementary table 2 (continued).** Molecular and clinical data from previously published patients with 15q14 deletions, harboring MEIS2. Abbreviations: ASD: autism spectrum disorder, ID: intellectual disability, NA: not available, NR: not reported, mo: months, HC: head circumference, L: length, PFO: patent foramen ovale, y: years, W: weight
