# Supplementary material for: Heterozygous loss-of-function variants of MEIS2 cause a triad of palatal defects, congenital heart defects, and intellectual disability
Source: Springer Nature journal article supplement (doi:10.1038/s41431-018-0281-5), 2018-10-05
Supplement: MOESM3 [file 41431_2018_281_MOESM3_ESM.pdf › 41431_2018_281_MOESM3_ESM.pdf]

|                                |                                |                                |                                |                                |                                |                                |                                |
|--------------------------------|--------------------------------|--------------------------------|--------------------------------|--------------------------------|--------------------------------|--------------------------------|--------------------------------|
|                                | Gambin, 2017                   | Decipher patient               |
| <b>patient ID</b>              | patient 1                      | patient 2                      | patient 3                      | patient 4                      | Patient 5                      | Patient 6                      | Patient 286841                 |
| <b>Sex</b>                     | M                              | M                              | F                              | M                              | M                              | M                              | M                              |
| <b>15q14 deletion (hg19)</b>   | g.(?_37328986)_(37332249_?)del | g.(?_35001138)_(39899594_?)del | g.(?_33894032)_(38659166_?)del | g.(?_35001138)_(38474933_?)del | g.(?_36512757)_(38052959_?)del | g.(?_36790702)_(37404359_?)del | g.(?_36606006)_(37515525_?)del |
| <b>Size (Mb)</b>               | 3.2 kb                         | 4.9 Mb                         | 4.8 Mb                         | 3.47 Mb                        | 1.54 Mb                        | 0.6 Mb                         | 909 kb                         |
| <b>CGH platform</b>            | OLIGO V6-V11; Agilent & WES    | NA                             |
| <b>inheritance</b>             | de novo                        | de novo                        | de novo                        | maternally inherited           | unknown                        | unknown                        | de novo                        |
| <b>other genetic defects</b>   | NR                             |
| <b>age</b>                     | NA                             | NA                             | NA                             | NA                             | NA                             | NA                             |                                |
| <b>cleft palate</b>            | cleft palate                   | NA                             | NA                             | NR                             | bifid uvula                    | NA                             | bifid uvula                    |
| <b>cardiac malformation</b>    | NR                             | NA                             | NA                             | NR                             | NR                             | NR                             | NA                             |
| <b>facial features</b>         | NA                             |
| <b>biometry</b>                | NA                             |
| <b>Intellectual disability</b> | speech delay                   | NA                             | NA                             | NR                             | global developmental delay     | speech delay                   | NA                             |
| <b>walked at age</b>           | NA                             | NA                             | NA                             | NA                             | 24 mo                          | NA                             | NA                             |
| <b>brain imaging by MRI</b>    | NR                             | NR                             | NR                             | NR                             | NR                             | NR                             | NA                             |
| <b>behavioral problems</b>     | NR                             | NA                             | NA                             | autism                         | autism                         | autism                         | NA                             |
| <b>other features</b>          | NR                             | hypertonia                     | multiple congenital anomalies  | NR                             | asthma                         | NR                             | asymmetric thorax              |

**Supplementary table 3. Molecular and clinical data from previously published patients with 15q14 deletions, harboring MEIS2.** These patients were excluded from genotype-phenotype analysis due to limited clinical data.
